# Supplementary material
Source: publisher figshare collection journal article supplement (https://acs.figshare.com/ndownloader/files/6041997)
Supplement: Supplementary file 1 [file 6041997]

# **Supporting Information**

Significantly Enhanced Energy Density in Nanocomposite Capacitors

Combining the TiO<sub>2</sub> Nanorod Array with Poly(vinylidene fluoride)

*Lingmin Yao<sup>a</sup>, Zhongbin Pan<sup>b</sup>, Shaohui Liu<sup>b</sup>, Jiwei Zhai<sup>b\*</sup>, Haydn H.D. Chen<sup>a\*</sup>*

<sup>a</sup>Institute of Applied Physics and Materials Engineering, Faculty of Science and Technology, University of Macau, Macao SAR 999078, China

<sup>b</sup>Key Laboratory of Advanced Civil Engineering Materials of Ministry of Education, Functional Materials Research Laboratory, School of Materials Science & Engineering, Tongji University, 4800 Caoan Road, Shanghai 201804, China.

\* [haydnchen@umac.mo](mailto:haydnchen@umac.mo) (Haydn H.D. Chen) and [apzhai@tongji.edu.cn](mailto:apzhai@tongji.edu.cn) (Jiwei, Zhai)

## Introduction

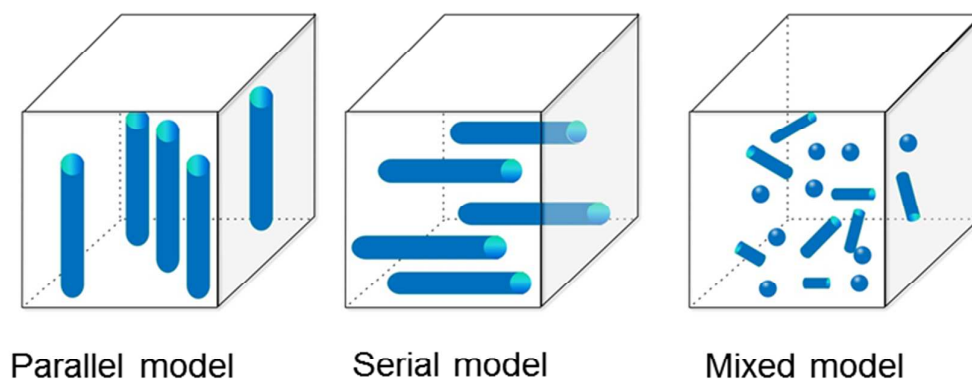

Figure S1 Common three models for the inorganic/organic nanocomposite

## Results and discussion

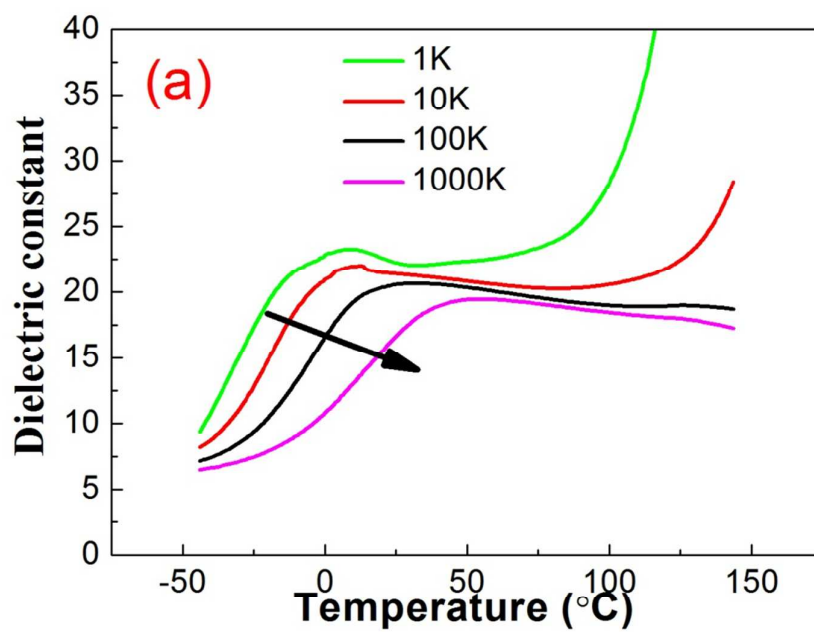

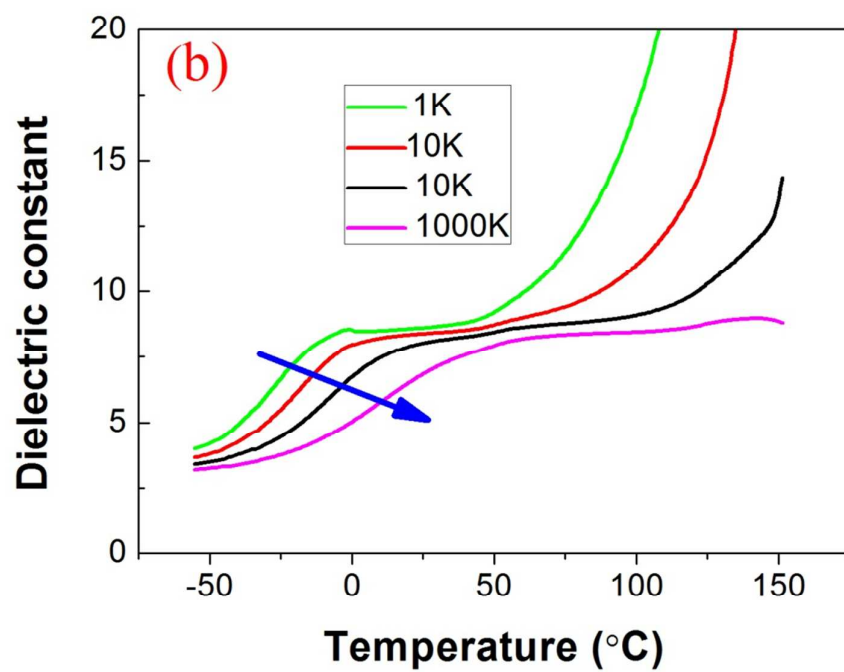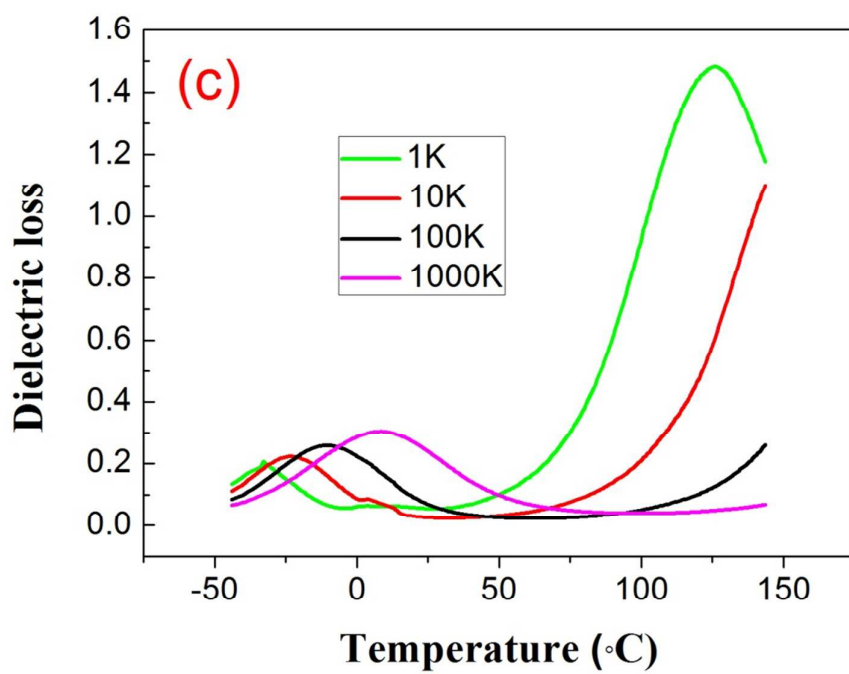

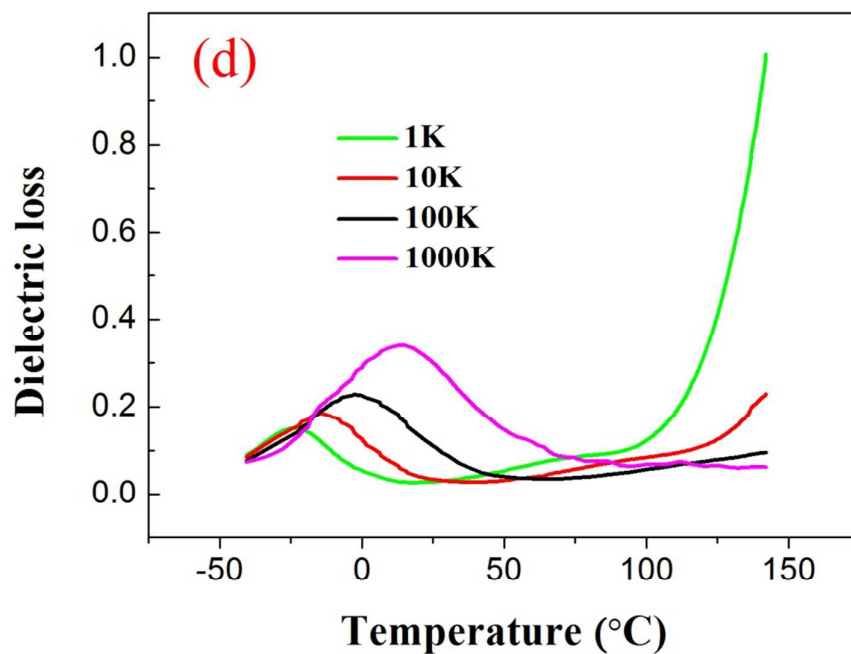

Figure S2 Temperature dependence of the dielectric constant and loss tangent measured from  $-50$  to  $130$  °C.: (a) dielectric constant of TNA/PVDF composite with  $h_{0.18}$ ; (b) dielectric constant of neat PVDF; (c) the loss tangent of TNA/PVDF composite with  $h_{0.18}$ ; (d) the loss tangent of PVDF.
